# Supplementary material for: Identification of novel long non-coding RNAs deregulated in hepatocellular carcinoma using RNA-sequencing
Source: PubMed Central journal article supplement (PMC5077982; doi:10.18632/oncotarget.7364), 2016-02-13
Supplement: oncotarget-07-31862-s001.pdf [file oncotarget-07-31862-s001.pdf]

## Identification of novel long non-coding RNAs deregulated in hepatocellular carcinoma using RNA-sequencing

### SUPPLEMENTARY FIGURE AND DATA

Altered in 12 (4%) of 377 patients/cases

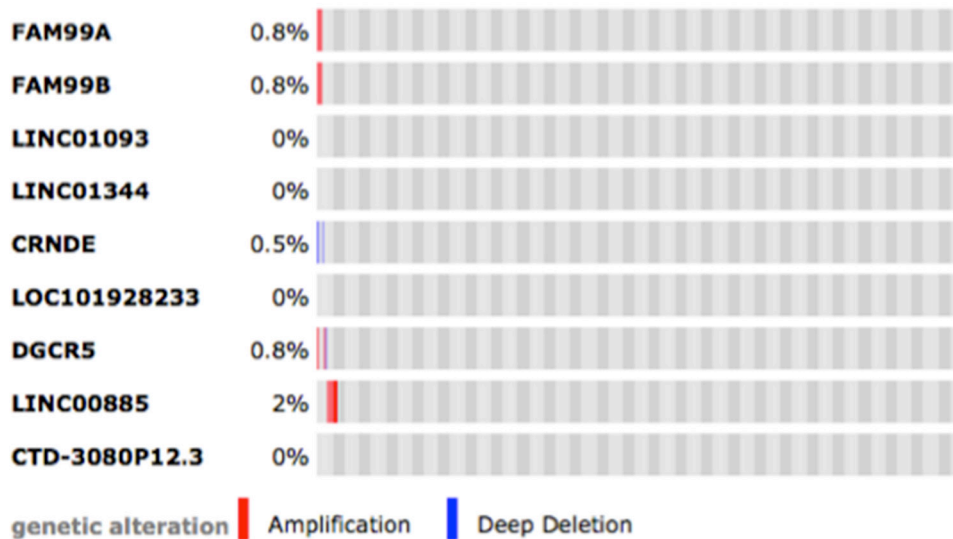

Supplementary Figure S1: Copy Number Alteration for eRNAs reported in HCC cases in the TCGA database, as reported by cBioportal ([www.cbioportal.org](http://www.cbioportal.org)).

**Supplementary Document S1**

See Supplementary File 1

**Supplementary Document S2**

See Supplementary File 2

**Supplementary Document S3**

See Supplementary File 3

**Supplementary Document S4**

See Supplementary File 4

**Supplementary Document S5**

See Supplementary File 5
